# Supplementary material for: Effect of probiotic supplementation combined with bismuth-containing quadruple therapy on gut microbiota during Helicobacter pylori eradication: a randomized, double-blind, placebo-controlled trial
Source: Frontiers journal article supplement (doi:10.3389/fnut.2024.1484646), 2024-10-16

**Figure S1. Mean difference in GSRS score between groups.**

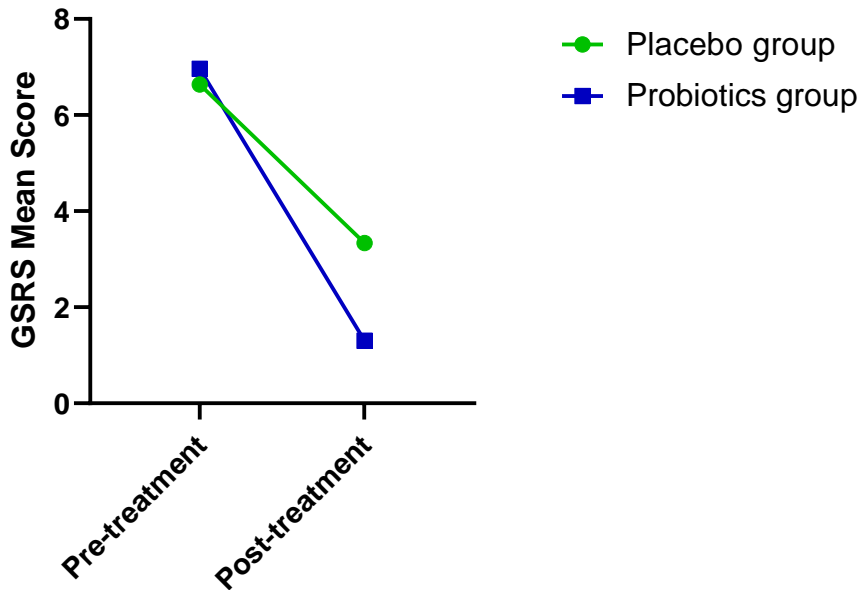

Supplement: Image_1.pdf [file Image_1.pdf]
