# Supplementary material for: Effect of probiotic supplementation combined with bismuth-containing quadruple therapy on gut microbiota during Helicobacter pylori eradication: a randomized, double-blind, placebo-controlled trial
Source: Front Nutr. 2024 Oct 16;11:1484646. doi: 10.3389/fnut.2024.1484646 (PMC11521887; doi:10.3389/fnut.2024.1484646)
Supplement: Supplementary file 2 [file Table_2.DOCX]

**Table S2. Pre-, post-treatment GSRS scores and mean difference within each group**

| **GSRS subscale** | **Placebo groupa** | ***P* value** | **Probiotic groupa** | ***P* value** |
| --- | --- | --- | --- | --- |
| (n = 50) | (n = 50) |
| Pre-treatment (week 0) | 6.64 (1.75-9.25) | ＜ 0.001b | 6.96 (2.00-9.25) | ＜ 0.001b |
| Post-treatment (week 2) | 3.34 (0.00-5.00) | 1.30 (0.00-2.00) |
| Mean difference | 3.30 (0.00-8.00) |  | 5.66 (1.00-9.00) | 0.041c |

GSRS, Gastrointestinal Symptom Rating Scale.

a Data were presented as median and interquartile range.

b Comparisons between pre- and post-treatment GSRS scores within each group.

c Comparisons of mean difference of GSRS score between the placebo and probiotic group.
